# Supplementary material for: Short Communication: Health Interventions in Volcanic Eruptions—Community Wearability Assessment of Respiratory Protection against Volcanic Ash from Mt Sinabung, Indonesia
Source: MDPI journal article supplement (doi:10.3390/ijerph15112359), 2018-10-25
Supplement: s1 [file s1]

**Table S1.** Percentage (%) of participants ranking each mask first, second, third and fourth for comfort.

| Mask          | Participants Mask Ranking (%) |        |       |        |
|---------------|-------------------------------|--------|-------|--------|
|               | First                         | Second | Third | Fourth |
| N95-equiv.    | 30.0                          | 30.0   | 10.0  | 30.0   |
| Surgical      | 3.7                           | 30.3   | 43.3  | 20.0   |
| Flat-fold     | 50.0                          | 26.7   | 16.7  | 6.7    |
| Surgical Plus | 13.3                          | 13.3   | 30.3  | 43.3   |

**Table S2.** Percentage (%) of participants ranking each mask first, second, third and fourth for ease of breathing.

| Mask          | Participants Mask Ranking (%) |        |       |        |
|---------------|-------------------------------|--------|-------|--------|
|               | First                         | Second | Third | Fourth |
| N95-equiv.    | 23.3                          | 6.7    | 16.7  | 53.3   |
| Surgical      | 20.0                          | 53.3   | 20.0  | 6.7    |
| Flat-fold     | 56.7                          | 23.3   | 16.7  | 3.3    |
| Surgical Plus | 0.0                           | 16.7   | 46.7  | 36.7   |

**Table S3.** Percentage (%) of participants ranking each mask first, second, third and fourth for fit.

| Mask          | Participants Mask Ranking (%) |        |       |        |
|---------------|-------------------------------|--------|-------|--------|
|               | First                         | Second | Third | Fourth |
| N95-equiv.    | 56.7                          | 13.3   | 13.3  | 16.7   |
| Surgical      | 16.7                          | 10.0   | 53.3  | 20.0   |
| Flat-fold     | 16.7                          | 53.3   | 10.0  | 20.0   |
| Surgical Plus | 10.0                          | 23.3   | 23.3  | 43.3   |

**Table S4.** Percentage (%) of participants ranking each mask first, second, third and fourth for effectiveness.

| Mask          | Participants Mask Ranking (%) |        |       |        |
|---------------|-------------------------------|--------|-------|--------|
|               | First                         | Second | Third | Fourth |
| N95-equiv.    | 56.7                          | 16.7   | 3.3   | 23.3   |
| Surgical      | 10.0                          | 16.7   | 46.7  | 26.7   |
| Flat-fold     | 23.3                          | 40.0   | 23.3  | 13.3   |
| Surgical Plus | 10.0                          | 26.7   | 26.7  | 36.7   |

**Table S5.** Percentage (%) of participants ranking each mask first, second, third and fourth for best liked.

| Mask          | Participants Mask Ranking (%) |        |       |        |
|---------------|-------------------------------|--------|-------|--------|
|               | First                         | Second | Third | Fourth |
| N95-equiv.    | 26.7                          | 30.0   | 13.3  | 30.0   |
| Surgical      | 13.3                          | 30.0   | 43.3  | 13.3   |
| Flat-fold     | 40.0                          | 26.7   | 16.7  | 16.7   |
| Surgical Plus | 20.0                          | 13.3   | 26.7  | 40.0   |
